# Supplementary material for: Delay Discounting in Gambling Disorder: Implications in Treatment Outcome
Source: MDPI journal article supplement (doi:10.3390/jcm11061611), 2022-03-14
Supplement: s1 [file s1]

**Table S1.** (Supplementary) SEM: direct, indirect and total effect tests.

| <b>Direct Effects</b>    |                   | <b>Coeff</b> | <b>SE</b>     | <b>z-stat</b> | <b>p</b> | <b>Std. Coeff</b> |
|--------------------------|-------------------|--------------|---------------|---------------|----------|-------------------|
| Structural               |                   |              |               |               |          |                   |
| TCI_Novelty seeking      | Age               | -0.158       | 0.084         | -1.87         | .049     | -0.156            |
|                          | Personality       | 1.000        | (constrained) |               |          | 0.154             |
| TCI_Cooperativeness      | Delay_discounting | -1.496       | 0.596         | -2.51         | .012     | -0.160            |
|                          | Personality       | -4.014       | 1.037         | -3.87         | <.001    | -0.540            |
| TCI_Self-transcendence   | Age               | 0.387        | 0.080         | 4.84          | <.001    | 0.349             |
|                          | Personality       | 1.671        | 0.645         | 2.59          | .010     | 0.234             |
| SOGS-total               | Delay_discounting | 0.409        | 0.150         | 2.73          | .006     | 0.216             |
|                          | Age               | -0.050       | 0.018         | -2.8          | .005     | -0.212            |
| SCL-90R GSI              | Personality       | 0.453        | 0.152         | 2.98          | .003     | 0.301             |
|                          | Delay_discounting | -0.054       | 0.025         | -2.19         | .028     | -0.137            |
| CBT Bad outcome          | Personality       | 0.185        | 0.045         | 4.08          | <.001    | 0.594             |
|                          | SOGS-total        | 0.037        | 0.014         | 2.67          | .008     | 0.222             |
|                          | Delay_discounting | 0.070        | 0.027         | 2.64          | .008     | 0.221             |
|                          | Age               | 0.000        | (no path)     |               |          | 0.000             |
|                          | Personality       | 0.000        | (no path)     |               |          | 0.000             |
| Measurement              |                   |              |               |               |          |                   |
| TCI_Harm avoidance       | Personality       | 2.309        | 0.987         | 2.34          | .019     | 0.286             |
| TCI_Reward dependence    | Personality       | -1.929       | 0.659         | -2.93         | .003     | -0.300            |
| TCI_Persistence          | Personality       | -0.929       | 0.897         | -1.04         | .300     | -0.091            |
| TCI_Self-directedness    | Personality       | -9.698       | 2.015         | -4.81         | <.001    | -1.000            |
| Impulsivity (UPPS-total) | Personality       | 6.391        | 1.549         | 4.13          | <.001    | 0.622             |
| Gambling preference      | Personality       | 0.047        | 0.020         | 2.3           | .022     | 0.206             |
| <b>Indirect effects</b>  |                   | <b>Coeff</b> | <b>SE</b>     | <b>z-stat</b> | <b>p</b> | <b>Std.Coeff</b>  |
| CBT Bad outcome          | SOGS-total        | 0.000        | (no path)     |               |          | 0.000             |
|                          | Delay_discounting | 0.015        | 0.008         | 1.91          | .056     | 0.048             |
|                          | Age               | -0.002       | 0.001         | -1.93         | .053     | -0.047            |
|                          | Personality       | 0.017        | 0.008         | 1.99          | .047     | 0.067             |
| <b>Total effects</b>     |                   | <b>Coeff</b> | <b>SE</b>     | <b>z-stat</b> | <b>p</b> | <b>Std.Coeff</b>  |
| Structural               |                   |              |               |               |          |                   |
| TCI_Novelty seeking      | Age               | -0.158       | 0.084         | -1.87         | .049     | -0.156            |
|                          | Personality       | 1.000        | (constrained) |               |          | 0.154             |
| TCI_Cooperativeness      | Delay_discounting | -1.496       | 0.596         | -2.51         | .012     | -0.160            |
|                          | Personality       | -4.014       | 1.037         | -3.87         | <.001    | -0.540            |
| TCI_Self-transcendence   | Age               | 0.387        | 0.080         | 4.84          | <.001    | 0.349             |
|                          | Personality       | 1.671        | 0.645         | 2.59          | .010     | 0.234             |
| SOGS-total               | Delay_discounting | 0.409        | 0.150         | 2.73          | .006     | 0.216             |
|                          | Age               | -0.050       | 0.018         | -2.8          | .005     | -0.212            |
| SCL-90R GSI              | Personality       | 0.453        | 0.152         | 2.98          | .003     | 0.301             |
|                          | Delay_discounting | -0.054       | 0.025         | -2.19         | .028     | -0.137            |
|                          | Personality       | 0.185        | 0.045         | 4.08          | <.001    | 0.594             |

|                          |                   |        |       |       |       |        |
|--------------------------|-------------------|--------|-------|-------|-------|--------|
| CBT Bad outcome          | SOGS-total        | 0.037  | 0.014 | 2.67  | .008  | 0.222  |
|                          | Delay_discounting | 0.086  | 0.027 | 3.23  | .001  | 0.269  |
|                          | Age               | -0.002 | 0.001 | -1.93 | .053  | -0.047 |
|                          | Personality       | 0.017  | 0.008 | 1.99  | .047  | 0.067  |
| Measurement              |                   |        |       |       |       |        |
| TCI_Harm avoidance       | Personality       | 2.309  | 0.987 | 2.34  | .019  | 0.286  |
| TCI_Reward dependence    | Personality       | -1.929 | 0.659 | -2.93 | .003  | -0.300 |
| TCI_Persistence          | Personality       | -0.929 | 0.897 | -1.04 | .300  | -0.091 |
| TCI_Self-directedness    | Personality       | -9.698 | 2.015 | -4.81 | <.001 | -1.000 |
| Impulsivity (UPPS-total) | Personality       | 6.391  | 1.549 | 4.13  | <.001 | 0.622  |
| Gambling preference      | Personality       | 0.047  | 0.020 | 2.3   | .022  | 0.206  |

Note. Coeff: un-standardized coefficient. SE: standard error. Std.Coeff: standardized coefficient. Sample size: n=133.
